# Supplementary material for: In situ growth of an opal-like TiO2 electron transport layer by atomic layer deposition for perovskite solar cells
Source: Royal Society of Chemistry journal article supplement (doi:10.1039/d0se01558j), 2020-12-23
Supplement: d0se01558j1.pdf [file d0se01558j1.pdf]

***Supporting Information***

**In-situ growth of an opal-like TiO<sub>2</sub> electron transport layer by atomic layer deposition for perovskite solar cells**

Hao Lu,\* Bangkai Gu and Song Fang

*Institute of Materials Science & Devices, School of Materials Science and Engineering,  
Suzhou University of Science and Technology, Suzhou, 215009, China.*

Email: [luhaoshaobo@163.com](mailto:luhaoshaobo@163.com), [haolu@usts.edu.cn](mailto:haolu@usts.edu.cn)

\*Corresponding author

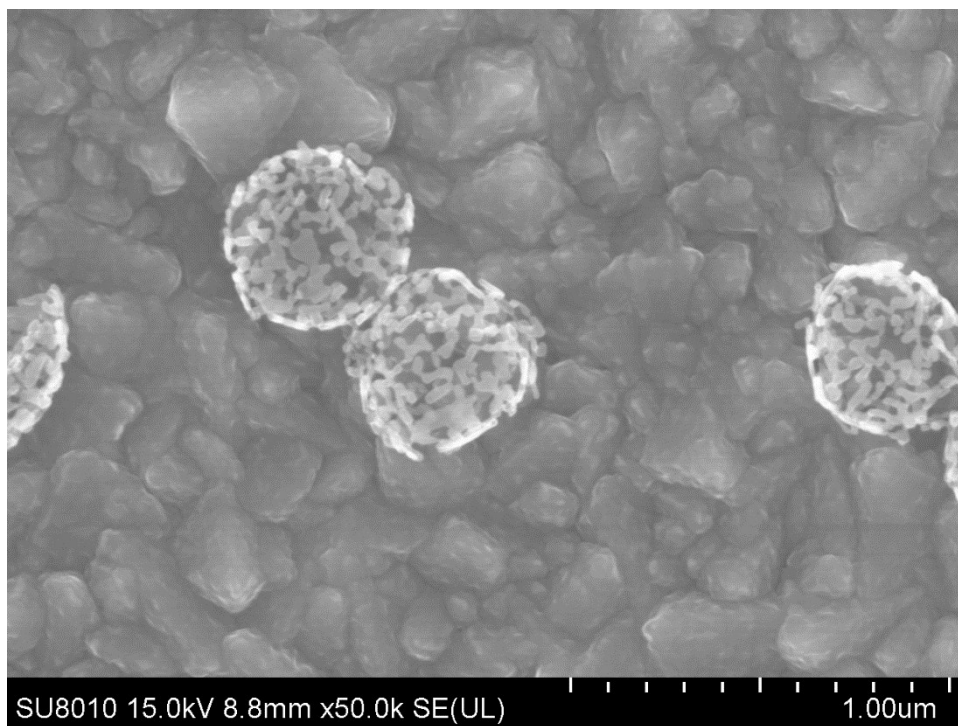

**Figure S1.** SEM image of PS spheres after annealing with 5 nm ALD  $\text{TiO}_2$  thickness.

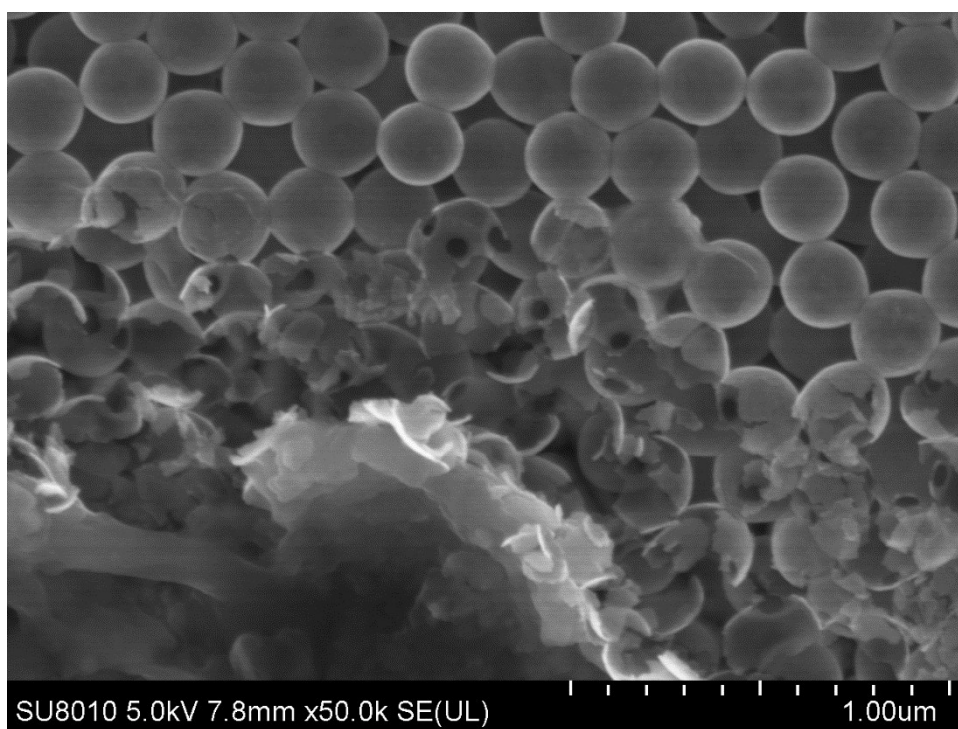

**Figure S2.** SEM image of crushed spheres.

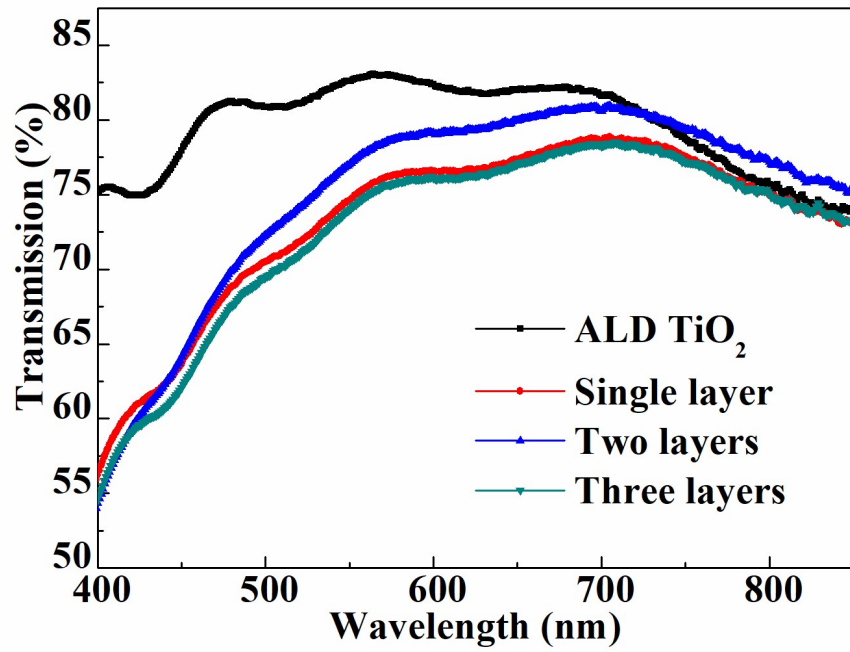

**Figure S3.** Transmission spectra of different TiO<sub>2</sub> ETLs.

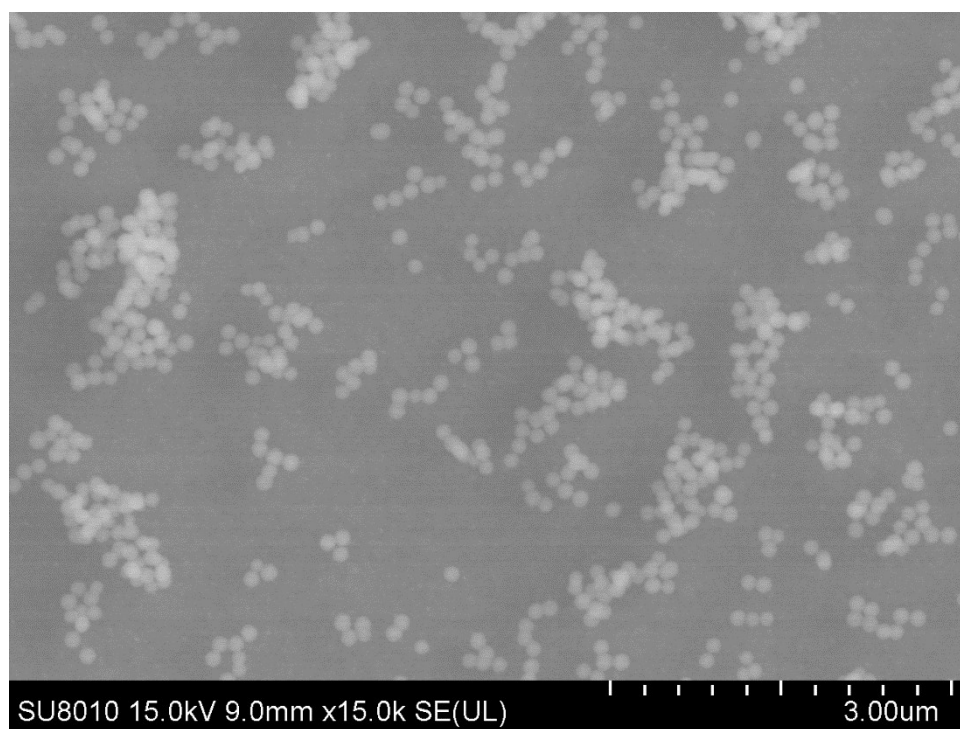

**Figure S4.** SEM image of 100 nm PS spheres.

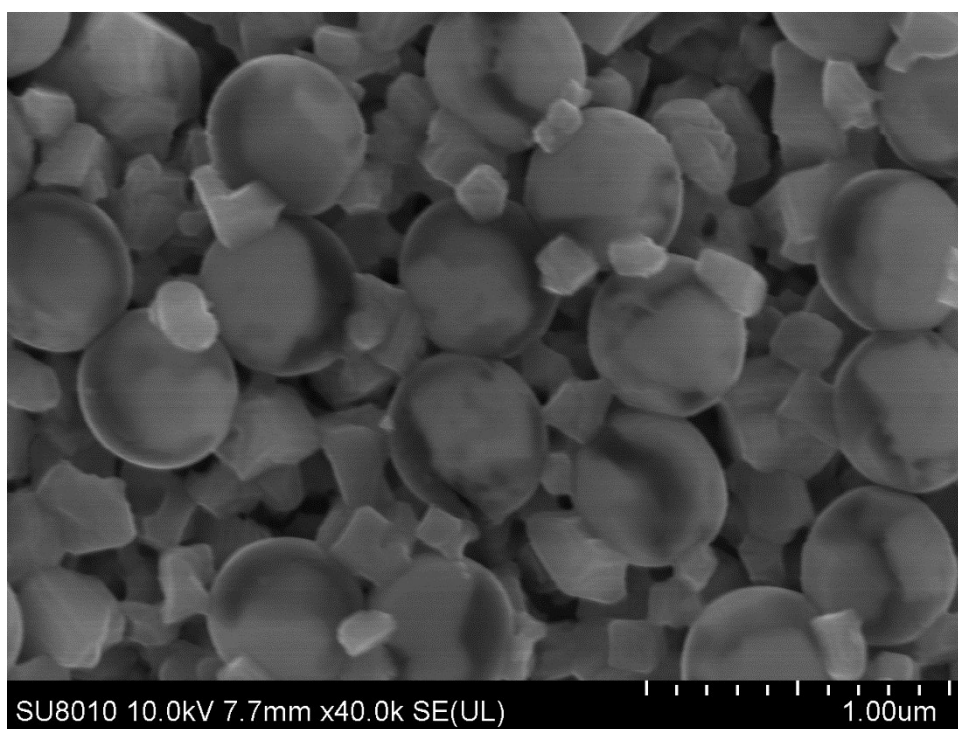

**Figure S5.** SEM image of PS 500 nm spheres with perovskite layer.

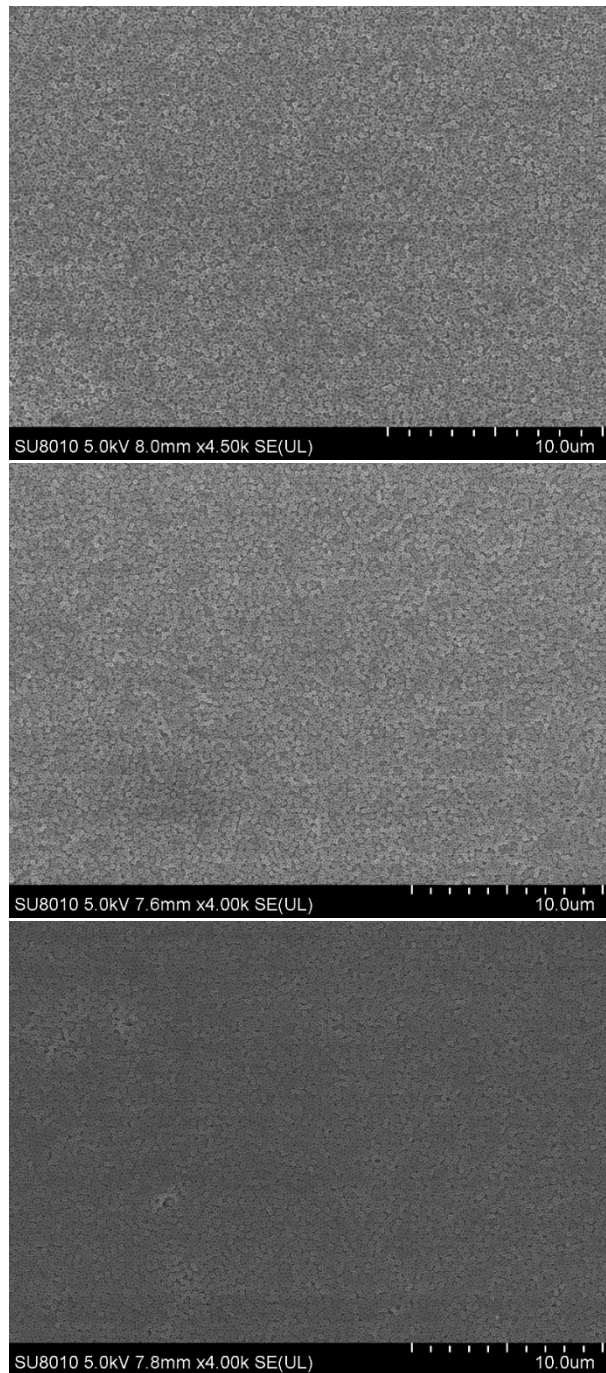

**Figure S6.** SEM image of one layer, two layers and three layers samples with low-magnification.

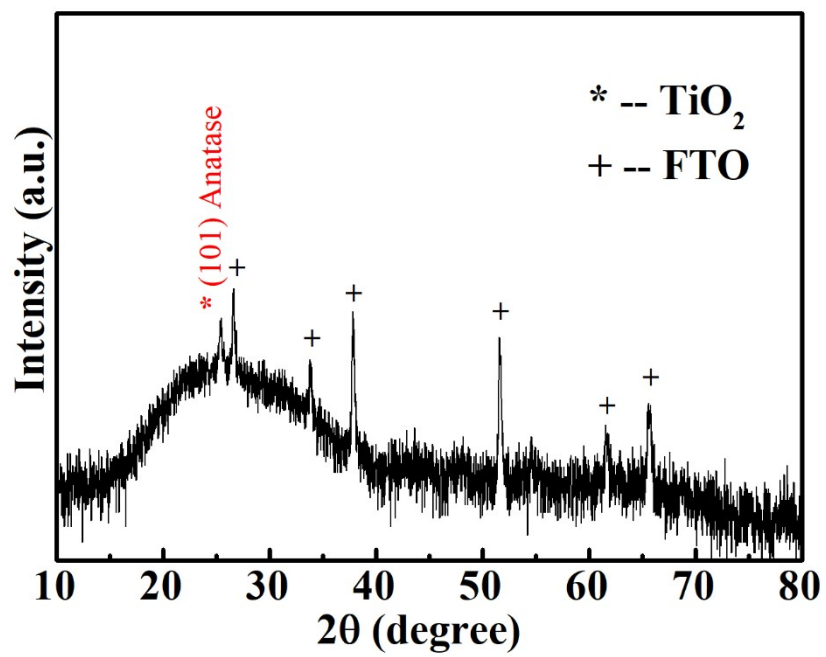

**Figure S7.** XRD pattern of as-prepared TiO<sub>2</sub> sample.



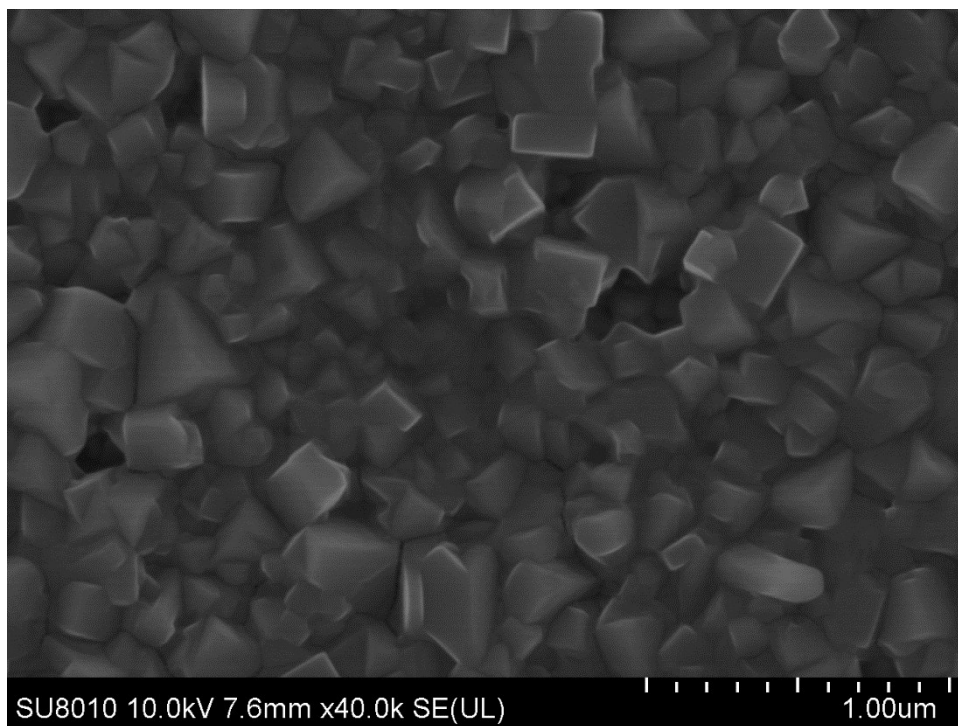

**Figure S8.** SEM image of perovskite layer on single layer  $\text{TiO}_2$  ETLs.

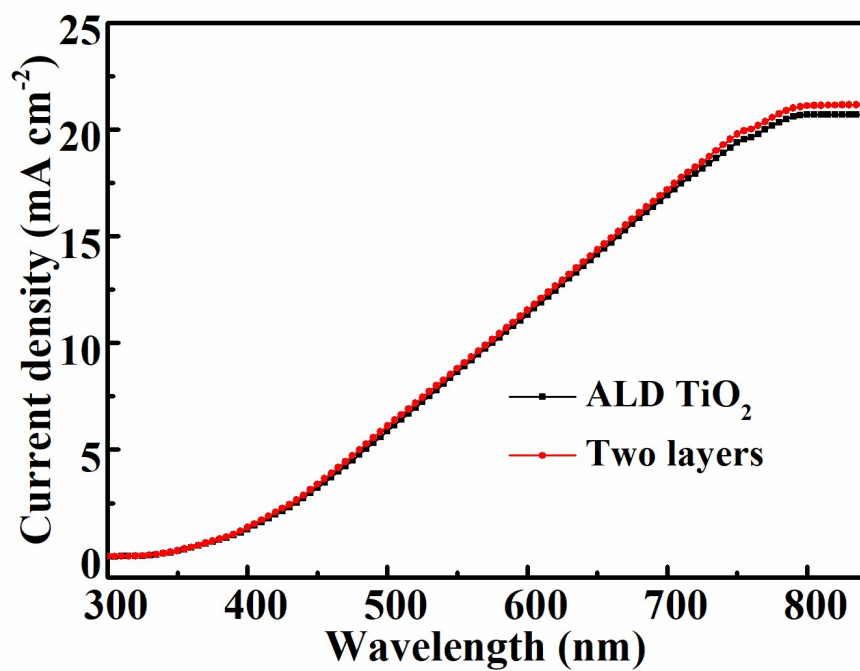

**Figure S9.** The integrated current density of ALD TiO<sub>2</sub> and Two layers TiO<sub>2</sub> based devices.

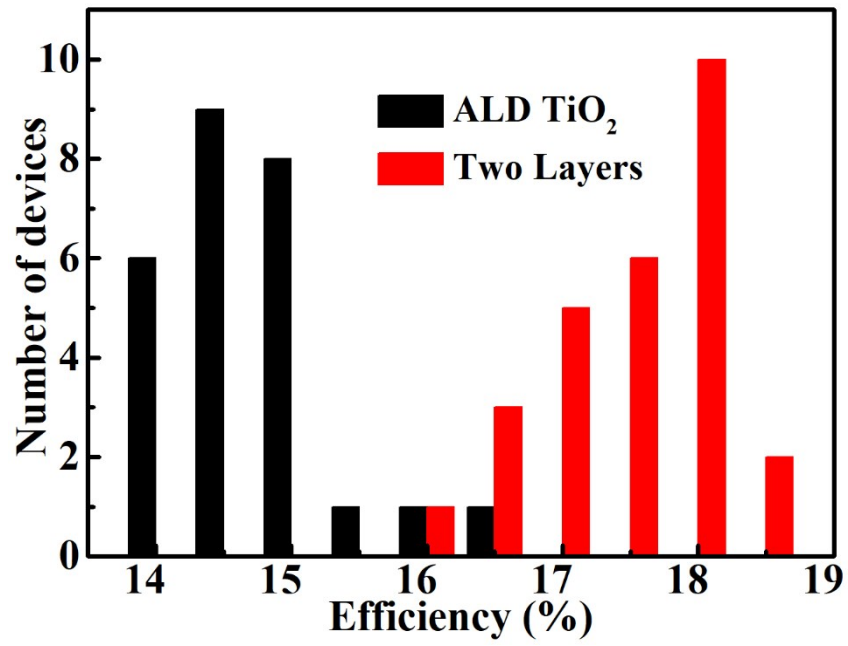

**Figure S10.** The repeatability of 26 devices of ALD and two layers samples.

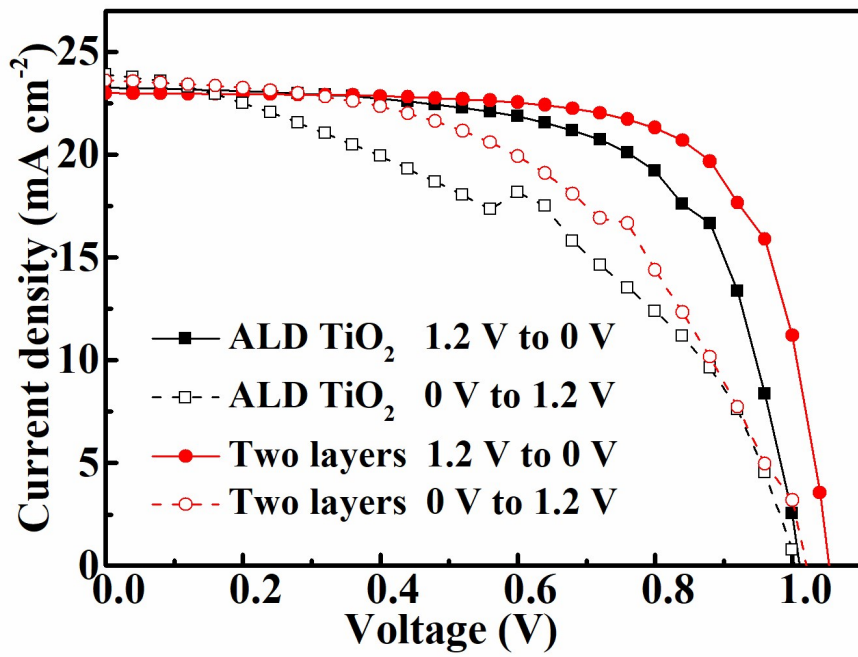

**Figure S11.** Forward and reverse scan of two layers and ALD TiO<sub>2</sub> devices.

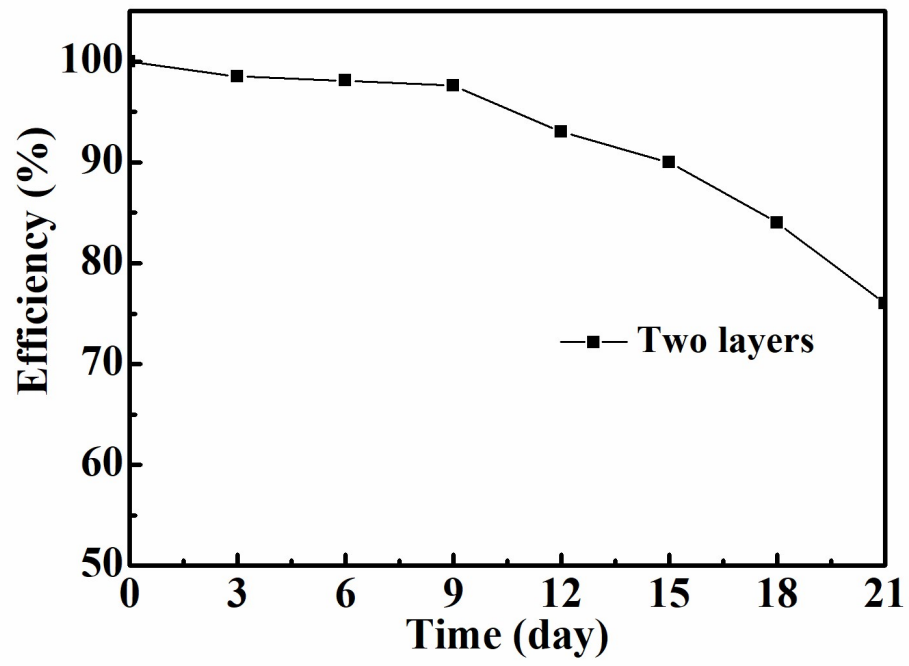

**Figure S12.** Long time measurement of two layers sample.

| Sample | $V_{oc}$ (V)    | $J_{sc}$ (mA cm <sup>-2</sup> ) | Fill Factor (%)  | Efficiency (%)   |
|--------|-----------------|---------------------------------|------------------|------------------|
| Planar | $0.99 \pm 0.02$ | $23.09 \pm 0.28$                | $63.32 \pm 4.14$ | $14.95 \pm 0.53$ |
| Single | $1.03 \pm 0.02$ | $23.63 \pm 0.57$                | $67 \pm 2.94$    | $16.43 \pm 0.75$ |
| Two    | $1.05 \pm 0.01$ | $23.76 \pm 0.16$                | $69.96 \pm 1.65$ | $17.5 \pm 0.55$  |
| Three  | $0.91 \pm 0.03$ | $23.77 \pm 0.35$                | $57.60 \pm 5.54$ | $12.47 \pm 1.27$ |

**Table S1.** The photovoltaic parameters of different TiO<sub>2</sub> ETLs based devices.

| Sample | $R_s$ ( $\Omega$ ) | $R_{ct1}$ ( $\Omega$ ) | $R_{ct2}$ ( $\Omega$ ) | $R_{ct} = R_{ct1} + R_{ct2}$ ( $\Omega$ ) | $R_{rec}$ ( $\Omega$ ) |
|--------|--------------------|------------------------|------------------------|-------------------------------------------|------------------------|
| Planar | 65.3               | 152.4                  | 178.9                  | 331.3                                     | 1181.5                 |
| Single | 52.4               | 155.1                  | 235.1                  | 390.2                                     | 1277.1                 |
| Two    | 49.4               | 132.9                  | 121.0                  | 253.9                                     | 2431.6                 |
| Three  | 22.3               | 208.4                  | 64.87                  | 273.3                                     | 11323                  |

**Table S2.** The fitted value of  $R_{ct}$  and  $R_{rec}$  of different  $TiO_2$  ETLs based devices.
